# Supplementary material for: GABRA3 promotes lymphatic metastasis in lung adenocarcinoma by mediating upregulation of matrix metalloproteinases
Source: PubMed Central journal article supplement (PMC5078017; doi:10.18632/oncotarget.8700), 2016-04-11
Supplement: oncotarget-07-32341-s001.pdf [file oncotarget-07-32341-s001.pdf]

# GABR<sub>A3</sub> promotes lymphatic metastasis in lung adenocarcinoma by mediating upregulation of matrix metalloproteinases

## Supplementary Materials

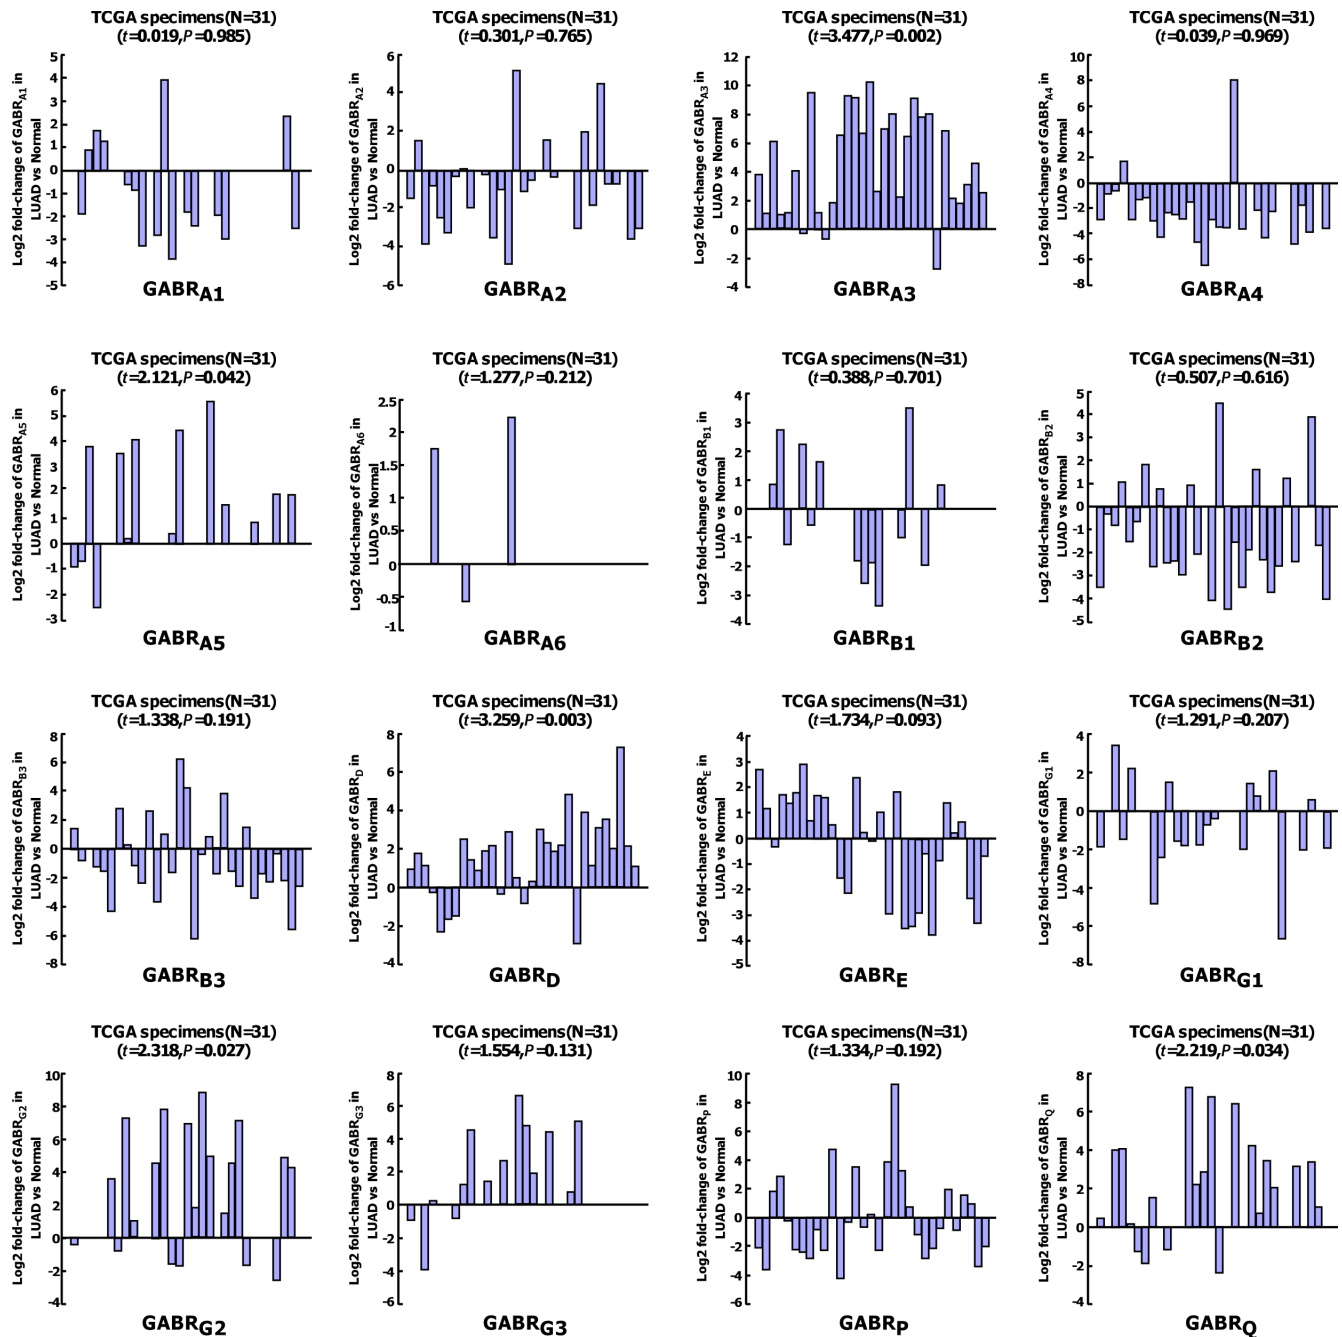

Supplementary Figure S1: Expression of the subunits of GABA A receptor in 31 paired LUAD tissues versus non-tumorous lung tissues using RNaseqV2 data sets on TCGA website.

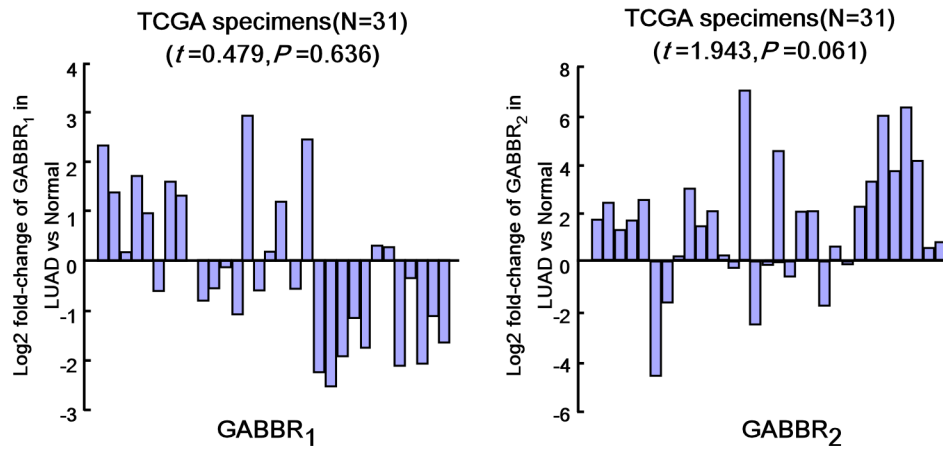

Supplementary Figure S2: Expression of the subunits of GABA B receptor in 31 paired LUAD tissues versus non-tumorous lung tissues using RNAseqV2 data sets on TCGA website.

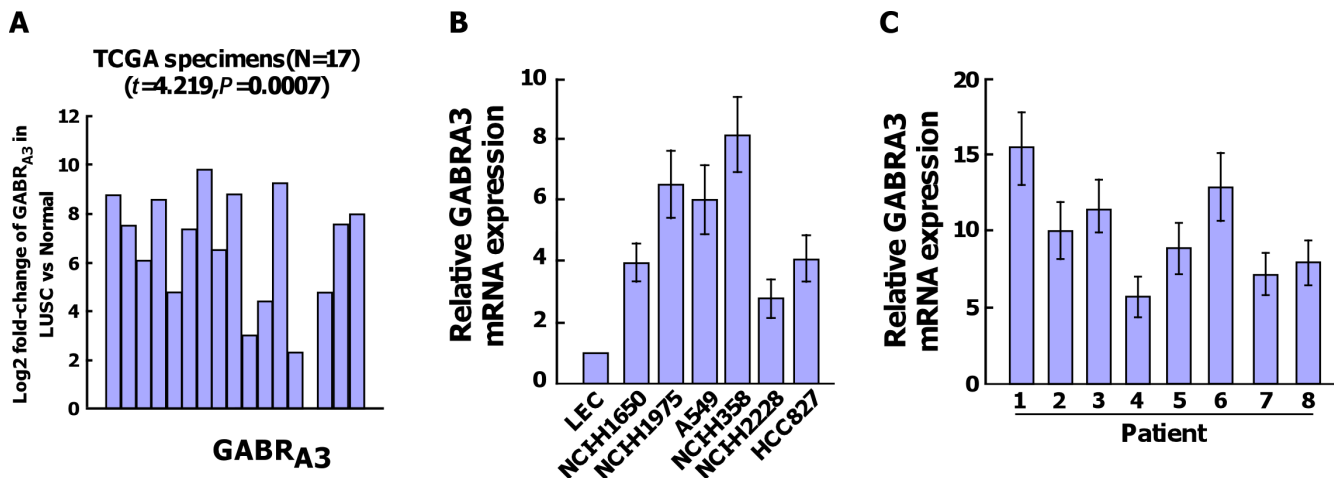

Supplementary Figure S3: GABR<sub>A3</sub> mRNA expression is upregulated in nonsmall-cell lung cancer. (A) Expression analysis of GABR<sub>A3</sub> in 17 paired LUSC tissues versus non-cancerous lung tissues using RNAseqV2 data sets on TCGA website. (B) Real-time PCR analysis of GABR<sub>A3</sub> mRNA expression in 6 indicated LUAD cell lines and normal human lung epithelial cells. (C) Real-time PCR analysis of GABR<sub>A3</sub> mRNA expression in clinical LUAD tissues compared with paired non-cancerous tissues. Transcript levels were normalized to GAPDH expression. Error bars represent the mean  $\pm$  SD from three independent experiments, \* $P < 0.05$ .

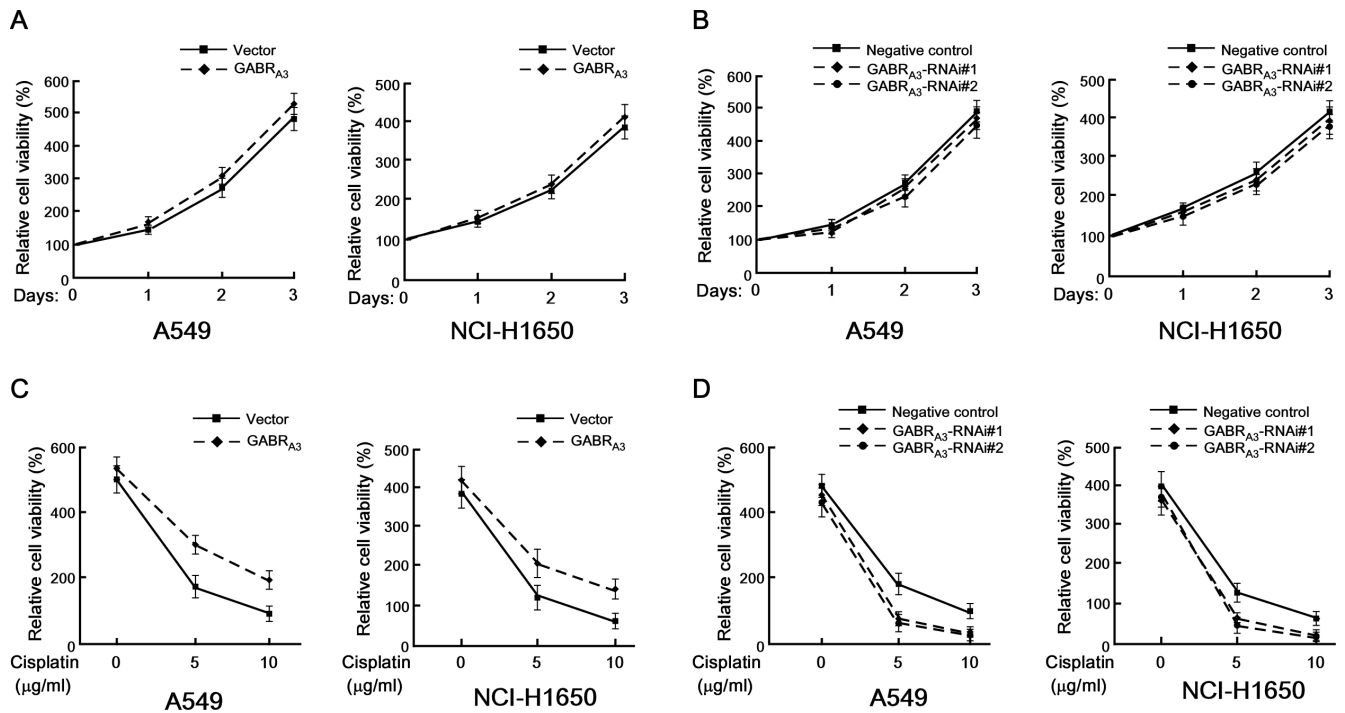

**Supplementary Figure S4: Effect of GABRA<sub>3</sub> on cell proliferation and apoptosis.** (A and B) Effects of overexpression (A) or silencing (B) effect of GABRA<sub>3</sub> on the proliferation of the indicated lung cancer cell lines, as analyzed by the MTT assay. C and D. Effects of overexpression (C) or silencing (D) effect of GABRA<sub>3</sub> on the chemoresistance of the indicated lung cancer cell lines, as analyzed by the cisplatin treatment assay.

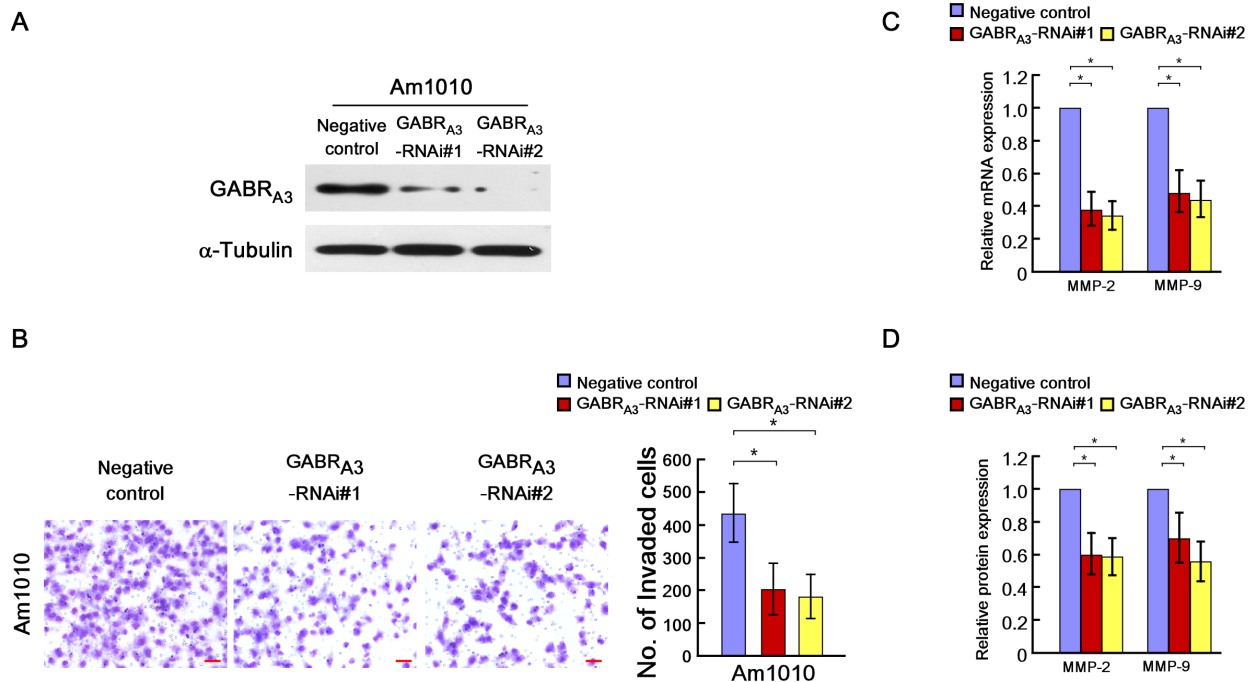

**Supplementary Figure S5: Silencing GABRA<sub>3</sub> decreases MMP2 and MMP-9 expression and inhibits the invasiveness of lung cancer primary cell Am1010.** (A) Western blot analysis of the effect of silencing GABRA<sub>3</sub> in Am1010 cell. α-Tubulin was used as a loading control. (B) Representative micrographs (left panel) and quantification (right panel) of indicated invaded cells by the transwell matrix penetration assay. Scale bars: 50 μm. (C) Real-time PCR analysis of MMP-2 and MMP-9 mRNA expression in the indicated cells. Transcript levels were normalized by GAPDH expression. (D) MMP-2 and MMP-9 protein levels in the supernatants of indicated cell cultures were assessed using ELISAs. Error bars represent the mean ± SD from three independent experiments, \**P* < 0.05.

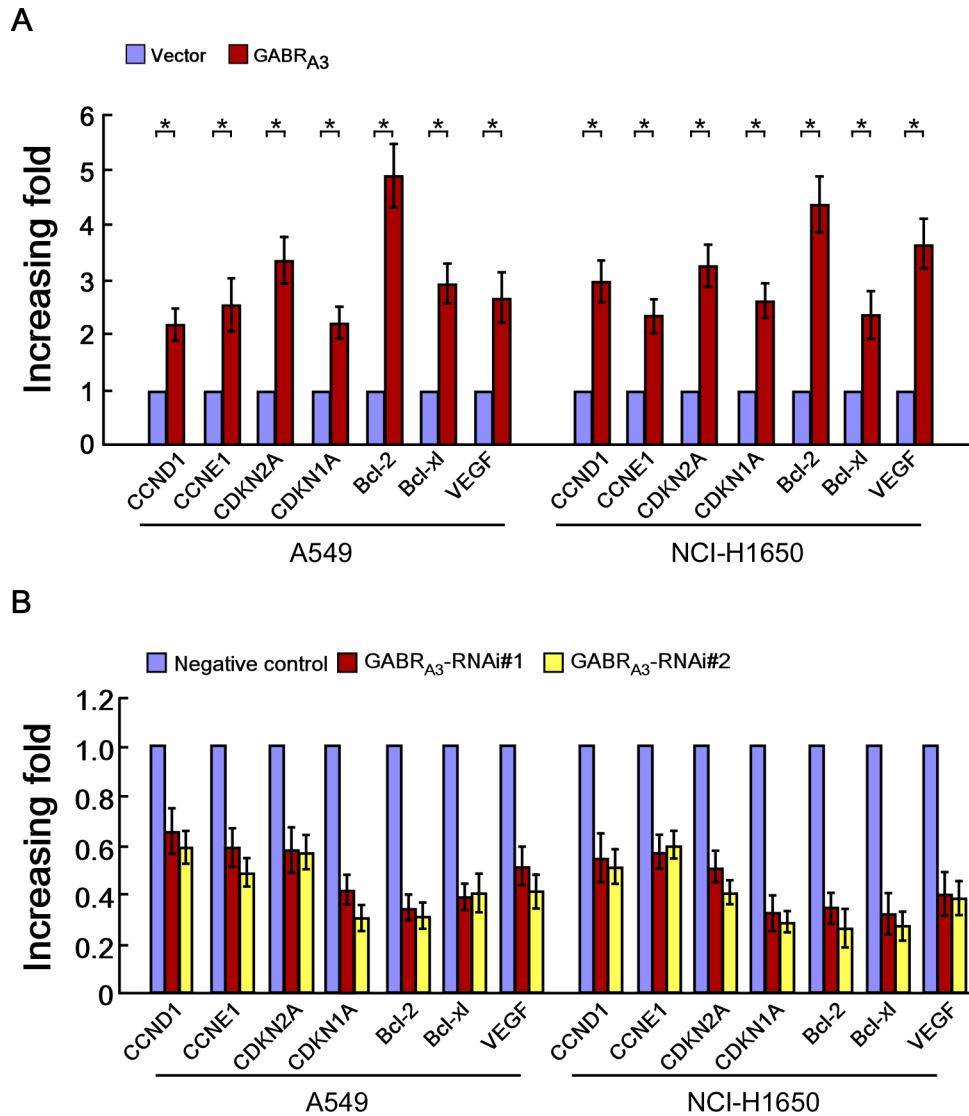

**Supplementary Figure S6: GABRA3 induces AP-1-dependent downstream genes expression in LUAD cells. (A and B)** Real-time PCR analysis of *CCND1*, *CCNE1*, *CDKN2A*, *CDKN1A*, *Bcl-2*, *Bcl-xl* and *VEGF*, the AP-1 downstream genes, in vector- or GABRA<sub>3</sub>-transduced cells (A), or negative control- or GABRA<sub>3</sub>-silenced cells (B). Transcript levels were normalized to GAPDH expression. Error bars represent the mean  $\pm$  SD of three independent experiments. \* $P < 0.05$ .

**Supplementary Table S1: Clinicopathological characteristics of studied patients and expression of GABRA<sub>3</sub> in lung adenocarcinoma**

| Factor                      | No  | (%)  |
|-----------------------------|-----|------|
| <b>Gender</b>               |     |      |
| Male                        | 75  | 52.4 |
| Female                      | 68  | 47.6 |
| <b>Age (years)</b>          |     |      |
| < 60                        | 69  | 48.3 |
| ≥ 60                        | 74  | 51.7 |
| <b>Clinical stage</b>       |     |      |
| I                           | 54  | 37.7 |
| II                          | 29  | 20.3 |
| III                         | 60  | 42.0 |
| <b>N classification</b>     |     |      |
| Yes                         | 77  | 53.8 |
| No                          | 66  | 46.2 |
| <b>Patient survival</b>     |     |      |
| Alive                       | 102 | 71.3 |
| Deceased                    | 41  | 28.7 |
| <b>Expression of GABRA3</b> |     |      |
| Low expression              | 61  | 42.7 |
| High expression             | 82  | 57.3 |

**Supplementary Table S2: Correlation between the clinicopathological features and expression of GABRA<sub>3</sub>**

| Patient characteristics | GABRA3 expression |      | P-value |         |
|-------------------------|-------------------|------|---------|---------|
|                         | Low               | High |         |         |
| <b>Gender</b>           | Male              | 34   | 41      | 0.504   |
|                         | Female            | 27   | 41      |         |
| <b>Age (years)</b>      | < 60              | 27   | 42      | 0.499   |
|                         | ≥ 60              | 34   | 40      |         |
| <b>Clinical stage</b>   | I                 | 38   | 16      | < 0.001 |
|                         | II                | 12   | 17      |         |
|                         | III               | 11   | 49      |         |
| <b>N classification</b> | Yes               | 17   | 60      | < 0.001 |
|                         | No                | 44   | 22      |         |
| <b>Survival</b>         | Alive             | 49   | 53      | 0.042   |
|                         | Deceased          | 12   | 29      |         |

**Supplementary Table S3: Univariate and multivariate analysis of different prognostic parameters in patients with lung adenocarcinoma by Cox-regression analysis**

| Variables                           | No. patients | Univariate analysis |                        | Multivariate analysis |                        |
|-------------------------------------|--------------|---------------------|------------------------|-----------------------|------------------------|
|                                     |              | HR <i>P</i> -value  | Hazard Ration (95% CI) | HR <i>P</i> -value    | Hazard Ration (95% CI) |
| <b>Gender</b>                       |              |                     |                        |                       |                        |
| < 60                                | 69           | -                   | 1                      | -                     | -                      |
| ≥ 60                                | 74           | 0.716               | 1.121 (0.605–2.077)    | -                     | -                      |
| <b>Gender</b>                       |              |                     |                        |                       |                        |
| Male                                | 75           | -                   | 1                      | -                     | -                      |
| Female                              | 68           | 0.242               | 0.688 (0.367–1.288)    | -                     | -                      |
| <b>Clinical stage</b>               |              |                     |                        |                       |                        |
| I                                   | 54           | -                   | 1                      | -                     | -                      |
| II                                  | 29           | 0.239               | 1.842 (0.666–5.09)     | 0.667                 | 1.701 (0.594–4.866)    |
| III                                 | 60           | 0.003               | 3.28 (1.483–7.252)     | 0.023                 | 2.869 (1.159–7.101)    |
| <b>GABR<sub>A3</sub> expression</b> |              |                     |                        |                       |                        |
| Low                                 | 61           | -                   | 1                      | -                     | -                      |
| High                                | 82           | 0.037               | 2.046 (1.044–4.013)    | 0.554                 | 1.262 (0.584–2.728)    |

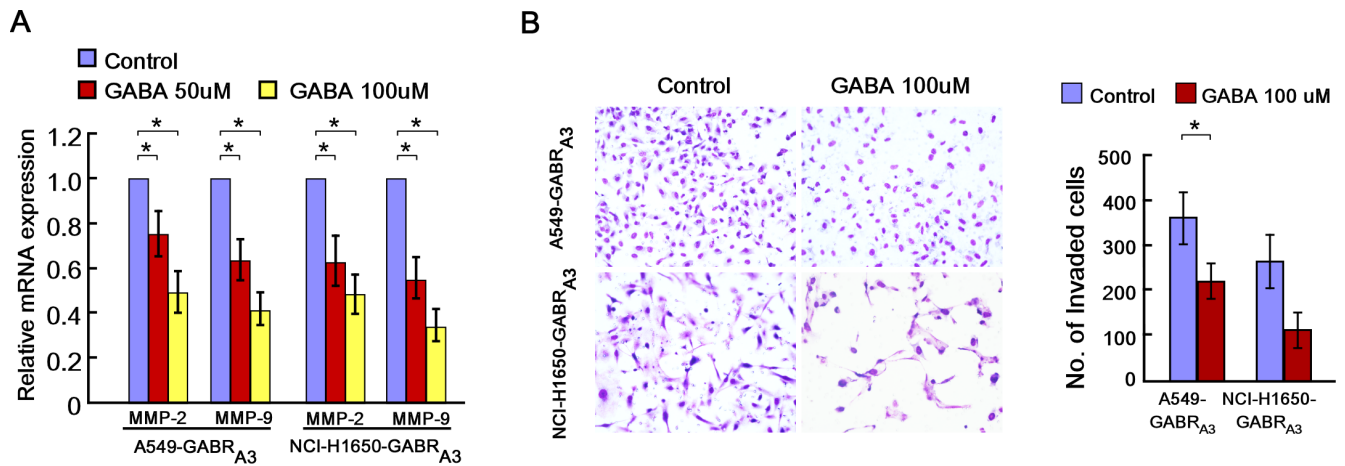

**Supplementary Figure for the editors reviewers**
